# Supplementary material for: Decrystallization of Crystals Using Gold “Nano-Bullets” and the Metal-Assisted and Microwave-Accelerated Decrystallization Technique
Source: MDPI journal article supplement (doi:10.3390/molecules21101388), 2016-10-18
Supplement: s1 [file s1]

# Supplementary Materials: Decrystallization of Crystals using Gold “Nano-bullets” and the Metal-Assisted and Microwave-Accelerated Decrystallization Technique

Nishone Thompson, Zainab Boone-Kukoyi, Raquel Shortt, Carisse Lansiquot, Bridgit Kioko, Enock Bonyi, Salih Toker, Birol Ozturk and Kadir Aslan

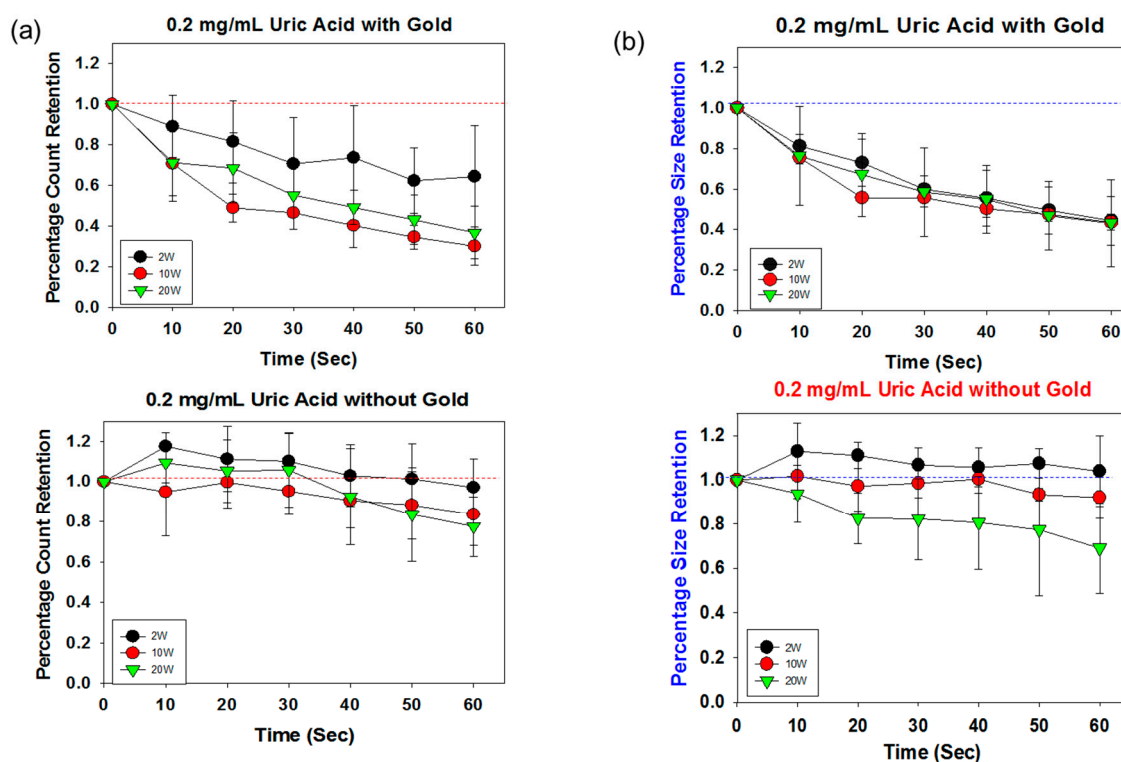

**Figure S1.** Normalized crystal (a) count and (b) size retention rate of small uric acid crystals in the presence of gold nanoparticles during 60 s of microwave heating. The initial concentration of uric crystals was set to 0.2 mg/mL.

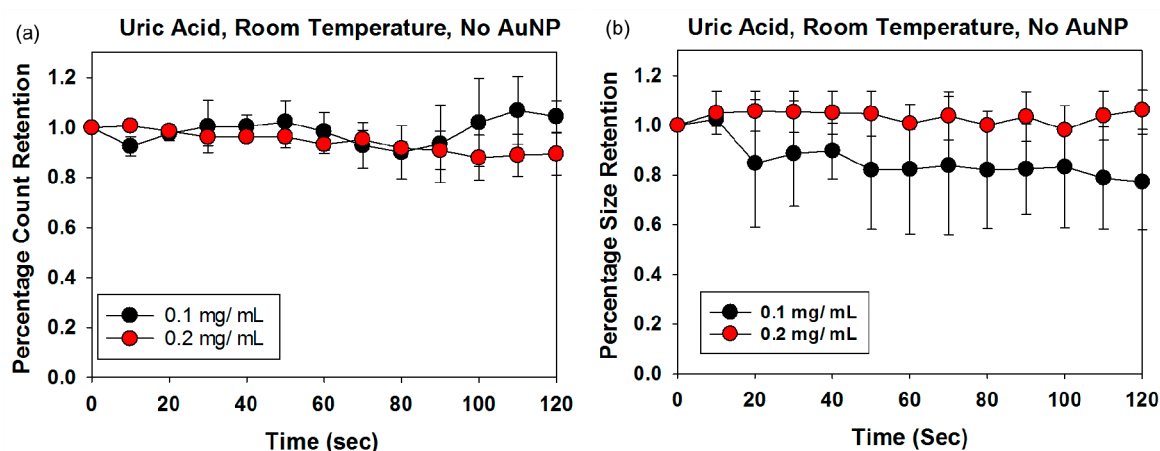

**Figure S2.** Normalized crystal (a) count and (b) size retention rate of uric acid crystals after 120 s of microwave heating in the presence of gold nanoparticles and in the absence of gold nanoparticles (control).

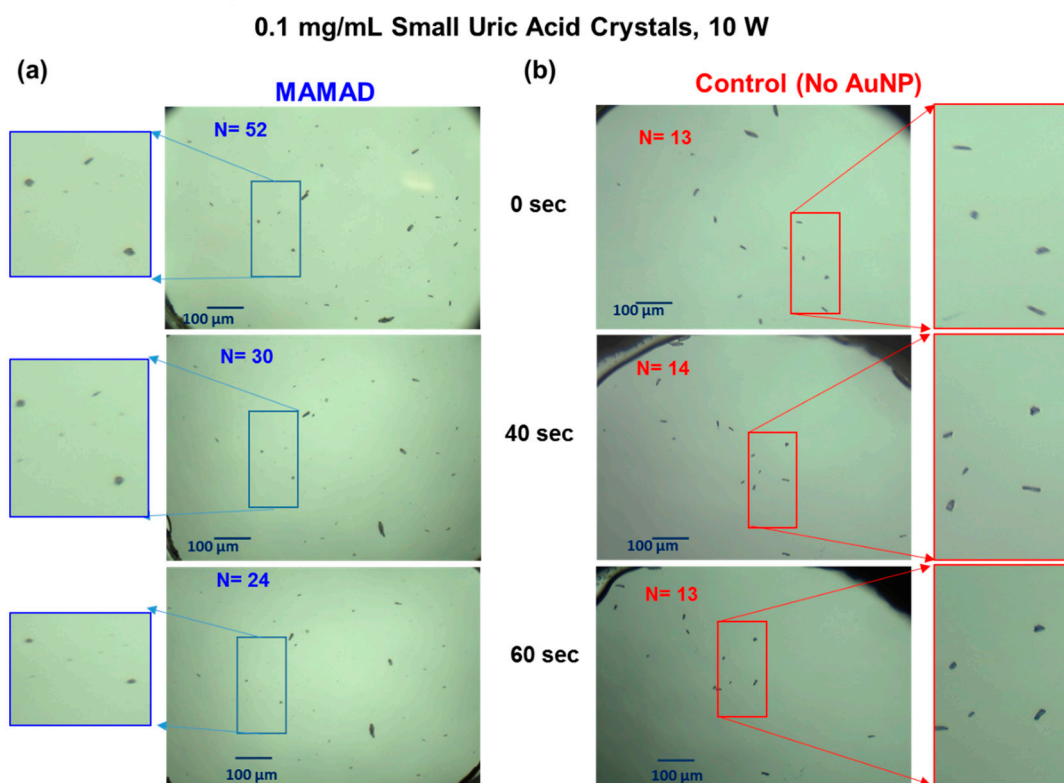

**Figure S3.** Optical images of small uric acid crystals (0.1 mg/mL) during 10 W microwave heating for 60 s (a) in the presence of gold nanoparticles (i.e., the MAMAD technique); (b) in the absence of gold nanoparticles.

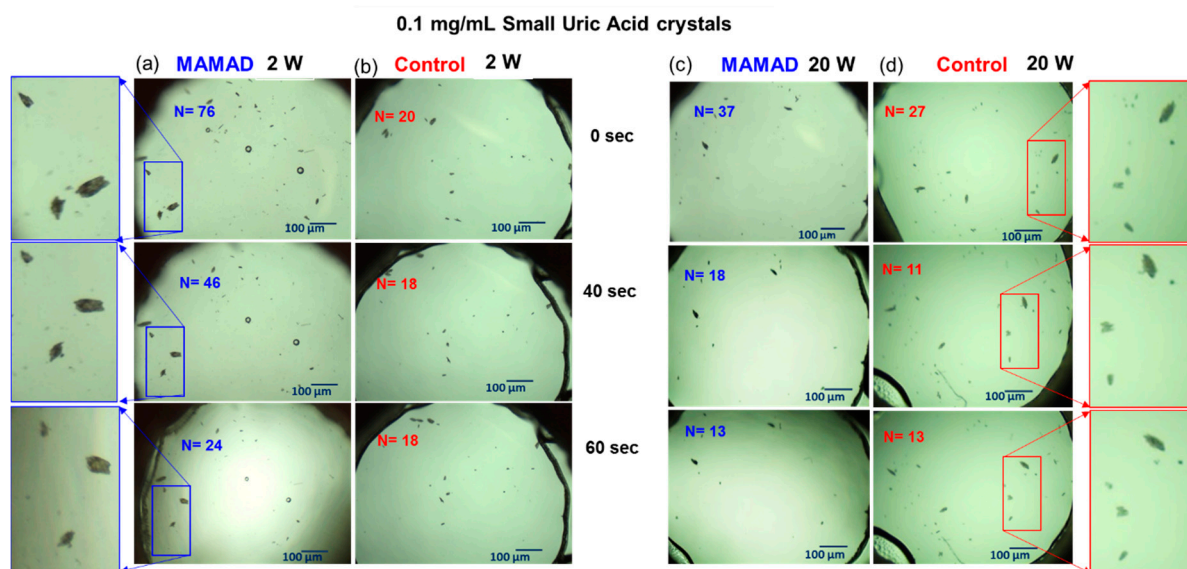

**Figure S4.** Optical images of small uric acid crystals (0.1 mg/mL) during microwave heating for 60 s (a) in the presence of gold nanoparticles at 2 W (i.e., the MAMAD technique); (b) in the absence of gold nanoparticles at 2 W (control); (c) in the presence of gold nanoparticles at 20 W (i.e., the MAMAD technique); (d) in the absence of gold nanoparticles at 20 W (control).

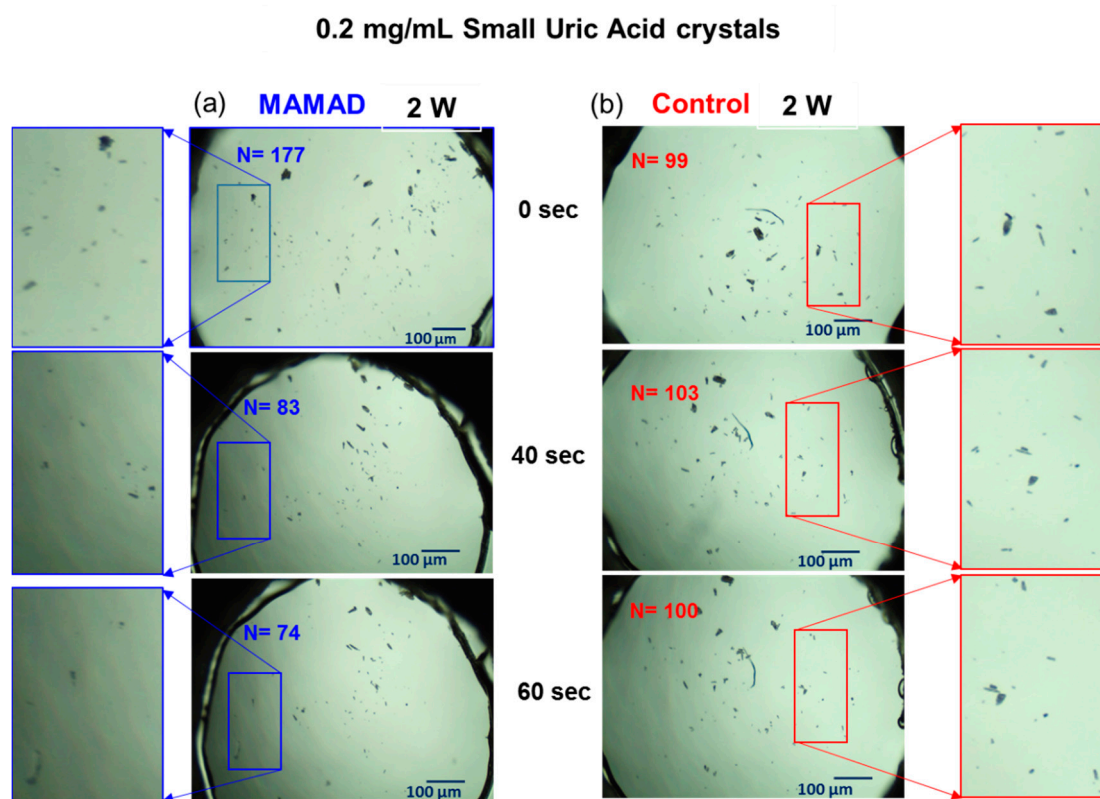

**Figure S5.** Optical images of small uric acid crystals (0.2 mg/mL) during 2 W microwave heating for 60 s (a); in the presence of gold nanoparticles (i.e., the MAMAD technique); (b) in the absence of gold nanoparticles.

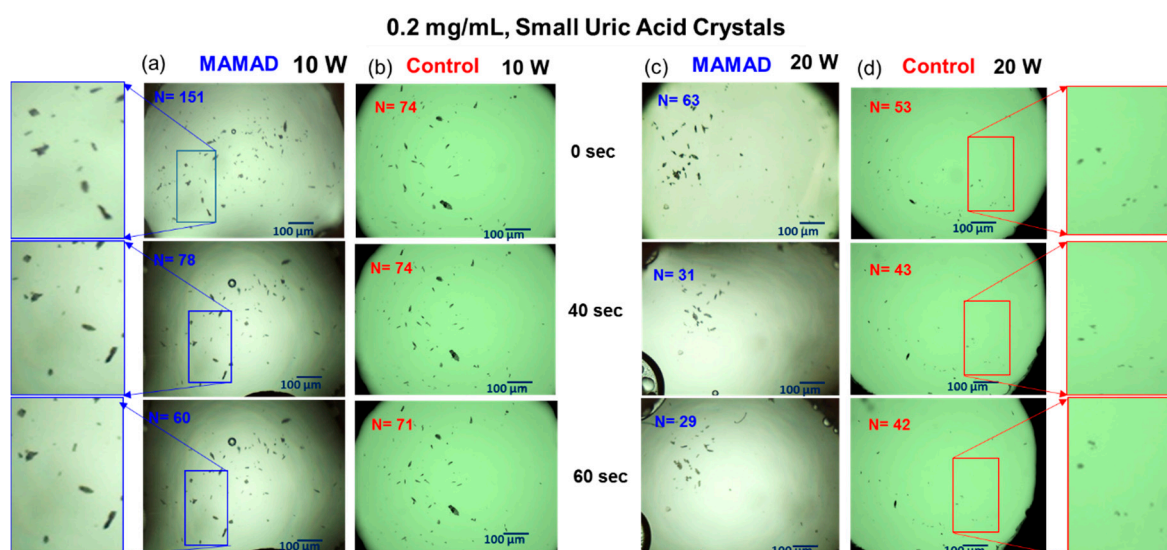

**Figure S6.** Optical images of small uric acid crystals (0.2 mg/mL) during microwave heating for 60 s (a) in the presence of gold nanoparticles at 2 W (i.e., the MAMAD technique); (b) in the absence of gold nanoparticles at 2 W (control); (c) in the presence of gold nanoparticles at 20 W (i.e., the MAMAD technique); (d) in the absence of gold nanoparticles at 20 W (control).

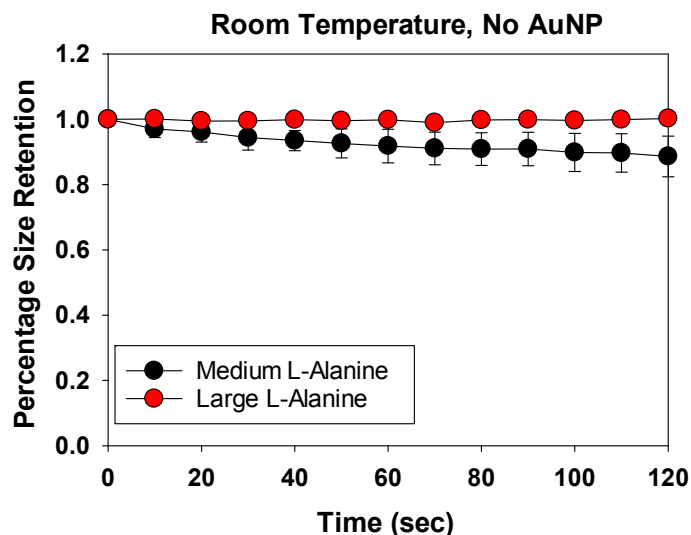

**Figure S7.** Reduction of crystal size at room temperature and without gold nanoparticles for medium and large L-Alanine crystals in deionized water.

**Trial 2: Medium L-Alanine Crystals, 10 W**

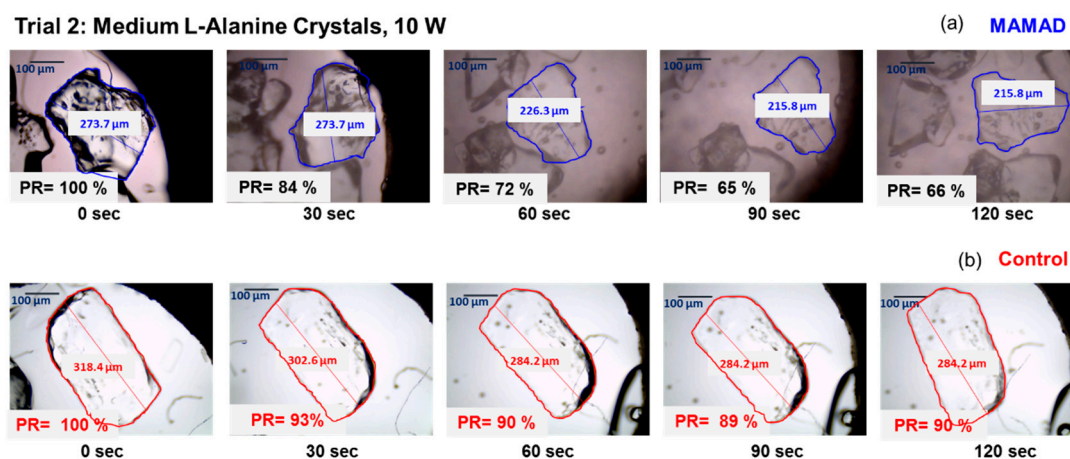

**Figure S8.** Trial 2: Optical images of medium-sized L-alanine crystals (initial size = 274 mm) during 10 W microwave heating for 120 s (a) in the presence of gold nanoparticles (i.e., the MAMAD technique); (b) in the absence of gold nanoparticles (control). PR = Percent Retention.



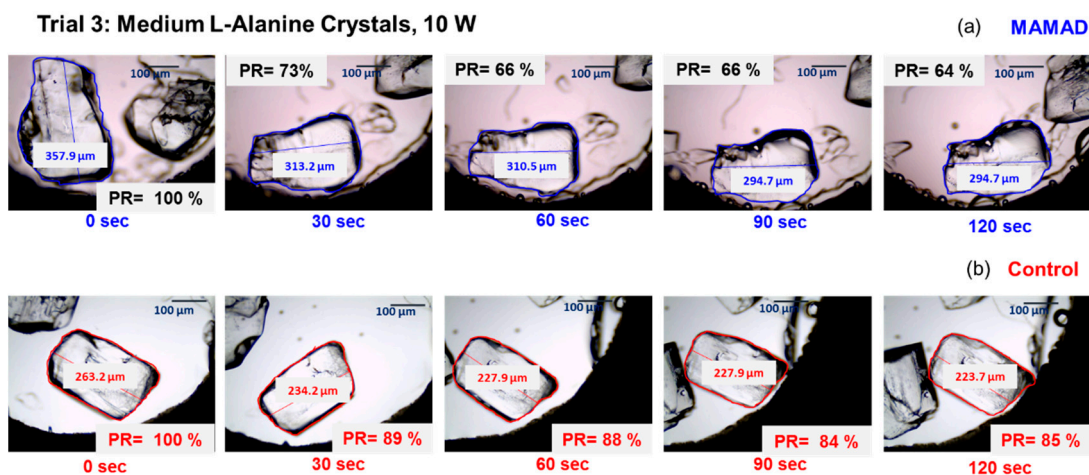

**Figure S9.** Trial 3: Optical images of medium-sized L-alanine crystals (initial size = 274 mm) during 10 W microwave heating for 120 s (a) in the presence of gold nanoparticles (i.e., the MAMAD technique); (b) in the absence of gold nanoparticles (control). PR = Percent Retention.

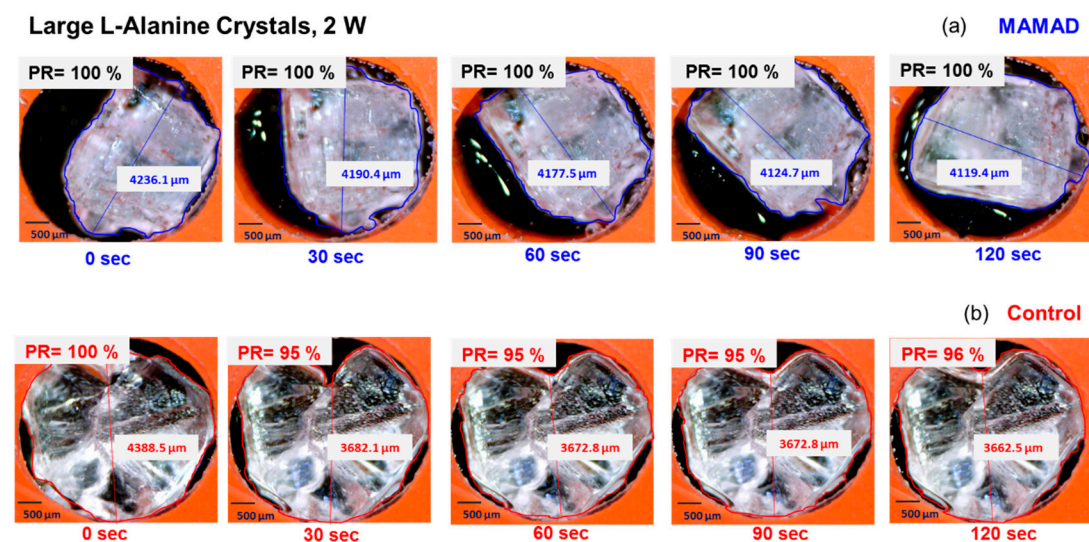

**Figure S10.** Optical images of medium-sized L-alanine crystals (initial size = 4236 mm) during 2 W microwave heating for 120 s (a) in the presence of gold nanoparticles (i.e., the MAMAD technique); (b) in the absence of gold nanoparticles (control). PR = Percent Retention.

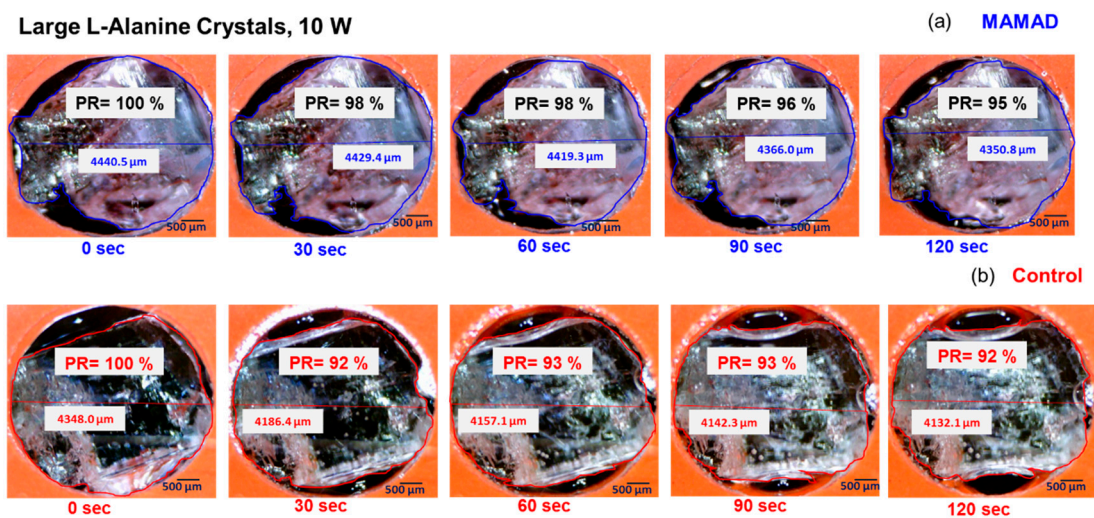

**Figure S11.** Optical images of medium-sized L-alanine crystals (initial size = 4441 mm) during 10 W microwave heating for 120 s (a) in the presence of gold nanoparticles (i.e., the MAMAD technique); (b) in the absence of gold nanoparticles (control). PR = Percent Retention.

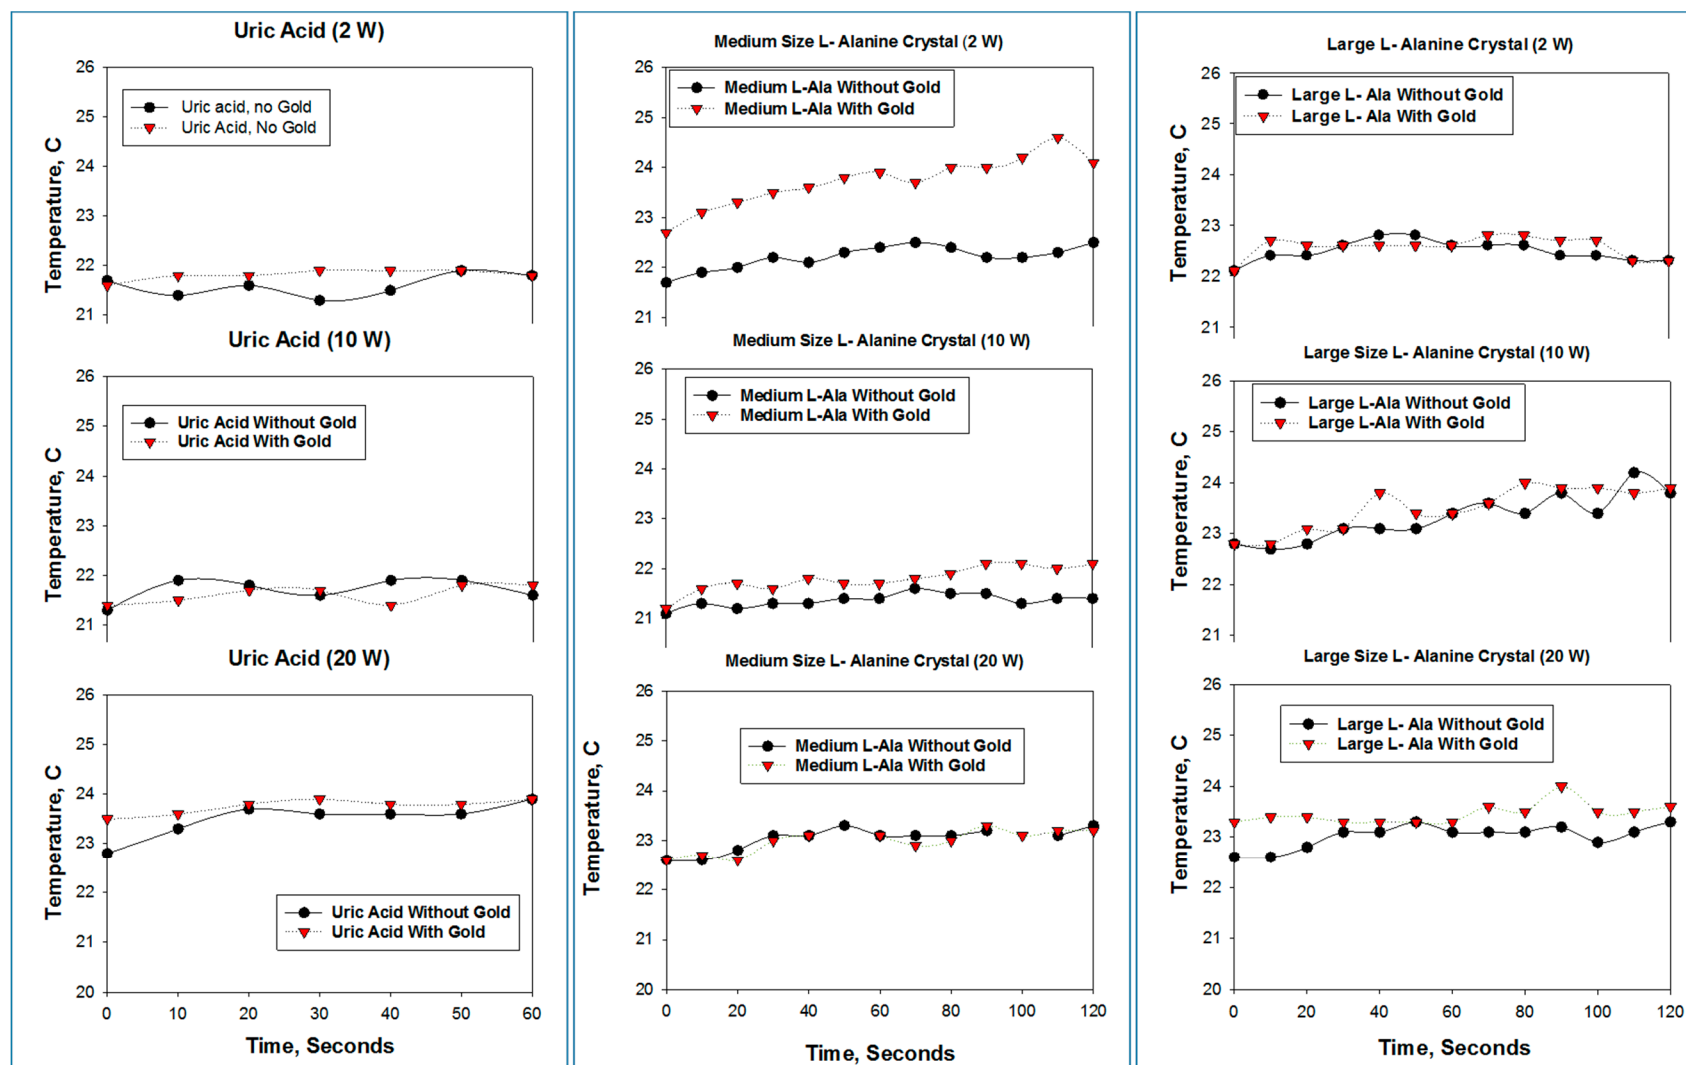

**Figure S12.** Real-time temperature measurements for uric acid crystals, medium and large L-alanine crystals during 2 W, 10 W and 20 W microwave heating for 60 s and 120 s, respectively in the presence of gold nanoparticles (i.e., the MAMAD technique) and in the absence of gold nanoparticles (control).
